RESEARCH ARTICLE

# ERα36, a variant of estrogen receptor α, is predominantly localized in mitochondria of human uterine smooth muscle and leiomyoma cells

Yitang Yan, Linda Yu, Lysandra Castro, Darlene Dixon\*

Molecular Pathogenesis Group, National Toxicology Program Laboratory (NTPL), National Toxicology Program, National Institute of Environmental Health Sciences (NIEHS), National Institutes of Health (NIH), Research Triangle Park, North Carolina, United States of America

\* [dixon@niehs.nih.gov](mailto:dixon@niehs.nih.gov)

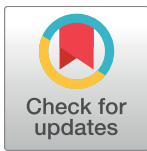

**OPEN ACCESS**

**Citation:** Yan Y, Yu L, Castro L, Dixon D (2017) ERα36, a variant of estrogen receptor α, is predominantly localized in mitochondria of human uterine smooth muscle and leiomyoma cells. PLoS ONE 12(10): e0186078. <https://doi.org/10.1371/journal.pone.0186078>

**Editor:** Ferenc Gallyas, Jr., University of PECS Medical School, HUNGARY

**Received:** August 10, 2017

**Accepted:** September 25, 2017

**Published:** October 11, 2017

**Copyright:** This is an open access article, free of all copyright, and may be freely reproduced, distributed, transmitted, modified, built upon, or otherwise used by anyone for any lawful purpose. The work is made available under the [Creative Commons CC0](https://creativecommons.org/licenses/by/4.0/) public domain dedication.

**Data Availability Statement:** All relevant data are within the paper and its Supporting Information files.

**Funding:** This research was supported by the National Toxicology Program (NTP) and the Intramural Research Program of the National Institutes of Health (NIH), National Institute of Environmental Health Sciences (NIEHS). The funders had no role in study design, data collection and analysis, decision to publish, or preparation of the manuscript.

## Abstract

ERα36 is a naturally occurring, membrane-associated, isoform of estrogen receptor α. The expression of ERα36 is due to alternative splicing and different promoter usage. ERα36 is a dominant-negative effector of ERα66-mediated transactivational activities and has the potential to trigger membrane-initiated mitogenic, nongenomic, estrogen signaling; however, the subcellular localization of ERα36 remains controversial. To determine the cellular localization of ERα36 in estrogen-responsive human uterine smooth muscle (ht-UtSMC) and leiomyoma (fibroid; ht-UtLM) cells, we conducted systematic confocal microscopy and subcellular fractionation analysis using ERα36 antibodies. With Image J colocalization analysis plugin, confocal images were analyzed to obtain a Pearson's Correlation Coefficient (PCC) to quantify signal colocalization of ERα36 with mitochondrial, endoplasmic reticulum, and cytoskeletal components in both cell lines. When cells were double-stained with an ERα36 antibody and a mitochondrial-specific dye, MitoTracker, the PCC for the two channel signals were both greater than 0.75, indicating strong correlation between ERα36 and mitochondrial signals in the two cell lines. A blocking peptide competition assay confirmed that the mitochondria-associated ERα36 signal detected by confocal analysis was specific for ERα36. In contrast, confocal images double-stained with an ERα36 antibody and endoplasmic reticulum or cytoskeletal markers, had PCCs that were all less than 0.4, indicating no or very weak signal correlation. Fractionation studies showed that ERα36 existed predominantly in membrane fractions, with minimal or undetected amounts in the cytosol, nuclear, chromatin, and cytoskeletal fractions. With isolated mitochondrial preparations, we confirmed that a known mitochondrial protein, prohibitin, was present in mitochondria, and by co-immunoprecipitation analysis that ERα36 was associated with prohibitin in ht-UtLM cells. The distinctive colocalization pattern of ERα36 with mitochondria in ht-UtSMC and ht-UtLM cells, and the association of ERα36 with a mitochondrial-specific protein suggest that ERα36 is localized primarily in mitochondria and may play a pivotal role in non-genomic signaling and mitochondrial functions.

**Competing interests:** The authors have declared that no competing interests exist.

## Introduction

Estrogen receptors belong to the nuclear receptor superfamily, whose members include estrogen receptor alpha (ER $\alpha$ ), estrogen receptor beta (ER $\beta$ ) and, estrogen-related receptors (ERR $\alpha$ ,  $\beta$ , and  $\gamma$ ) [1]. Estrogens control a variety of physiological and disease processes, notably reproduction, secondary sex characteristics, bone remodeling, and gynecologic cancer development. Estrogen's effects can be transduced through canonical ER $\alpha$  (ER $\alpha$ 66), or ER $\beta$ . Each estrogen receptor classically functions through direct binding with a specific ligand, such as estrogen (17- $\beta$  estradiol) or a phytoestrogen, like genistein. However, other molecular pathways such as nongenomic or ligand independent growth factor signaling have been described for classical estrogen receptor regulation [2].

Recently, a novel splice variant of the human ER $\alpha$ , named ER $\alpha$ 36, was cloned from human placenta mRNA. ER $\alpha$ 36 lacks both transactivation function domains, AF-1 and AF-2, of the full-length ER $\alpha$  (ER $\alpha$ 66), and possesses an intact DNA-binding domain and a truncated ligand-binding and a partial dimerization domain [3] (Fig 1A). ER $\alpha$ 36 was reported to be predominantly associated with the plasma membrane where it was found to transduce both estrogen- and antiestrogen-dependent activation of the mitogen-activated protein kinase/extracellular signal-regulated kinase (MAPK) signaling pathway. ER $\alpha$ 36 lacks intrinsic transcriptional activity and mainly mediates non-genomic estrogen signaling [4]. ER $\alpha$ 36 is expressed in both ER-positive and ER-negative breast cancer; however, ER $\alpha$ 36 expression is more abundant in ER-negative breast cancer that constitutes ~30% of all breast cancers diagnosed in women in the US and is generally a more aggressive cancer that, typically lacks wild-type ER $\alpha$  (ER $\alpha$ 66)-positive cells [3]. ER $\alpha$ 36 is predicted to serve as a dominant-negative effector of ER $\alpha$  and ER $\beta$  estrogen-mediated genomic signaling and has the capacity to trigger membrane-initiated mitogenic estrogen signaling. ER $\alpha$ 36 contributes to the resistance of breast cancer to selective estrogen receptor modulator (SERM) therapy, i.e., tamoxifen treatment. Due to the high levels of ER $\alpha$ 36 expression, ER $\alpha$ -negative breast cancer cells can maintain estrogen mitogenic signaling in the absence of wild-type ER $\alpha$ 66, which may explain the acquired tamoxifen resistance [5]. ER $\alpha$ 36 may serve as a target for treating ER-negative breast cancers [5] and for the treatment of breast cancers with acquired tamoxifen resistance [6]. Additionally, ER $\alpha$ 36 may be important in regulating the normal estrous cycle. In the hamster ovary, ER $\alpha$ 36 expression was upregulated during estrus, and the gonadotropin surge had a direct effect on ER $\alpha$ 36 expression [7].

Despite the fact that ER $\alpha$ 36 mediates important roles in non-genomic signaling in cancer growth, acquired tamoxifen resistance and normal estrous cycling, the exact subcellular localization of ER $\alpha$ 36 is controversial. ER $\alpha$ 36 was reported to be predominantly localized in the plasma membrane of both ER $\alpha$  and androgen receptor negative endometrial cancer (Hec1A) cells [8]. It has been shown in triple negative breast cancer cells that ER $\alpha$ 36 is expressed in a diffuse, intracellular, and linear or dotted membranous pattern [9]. The receptor was also reported to exist in the Golgi apparatus and the nuclear membrane [9]. In seminoma Tcam-2 cells, ER $\alpha$ 36 was associated with cytoplasmic filamentous structures beneath the plasma membrane that were determined to be actin microfilaments by immunogold labeling. The authors concluded that the colocalization with cytoskeletal microfilaments suggests a role of ER $\alpha$ 36 in cell motility [10]. To date, the subcellular localization of ER $\alpha$ 36 remains controversial in the literature and appears to vary between cell types [8–10]. Most of the previous research on ER $\alpha$ 36 expression, localization and function has been done in cancer cells, and has focused mainly on breast cancer; however, it has also been studied in endometrial, gastric, colon and seminoma cancer cells [11].

Uterine fibroids (leiomyomas) are one of the most common hormonally-responsive benign tumors affecting women of reproductive-age [12]. Although the exact etiology of uterine

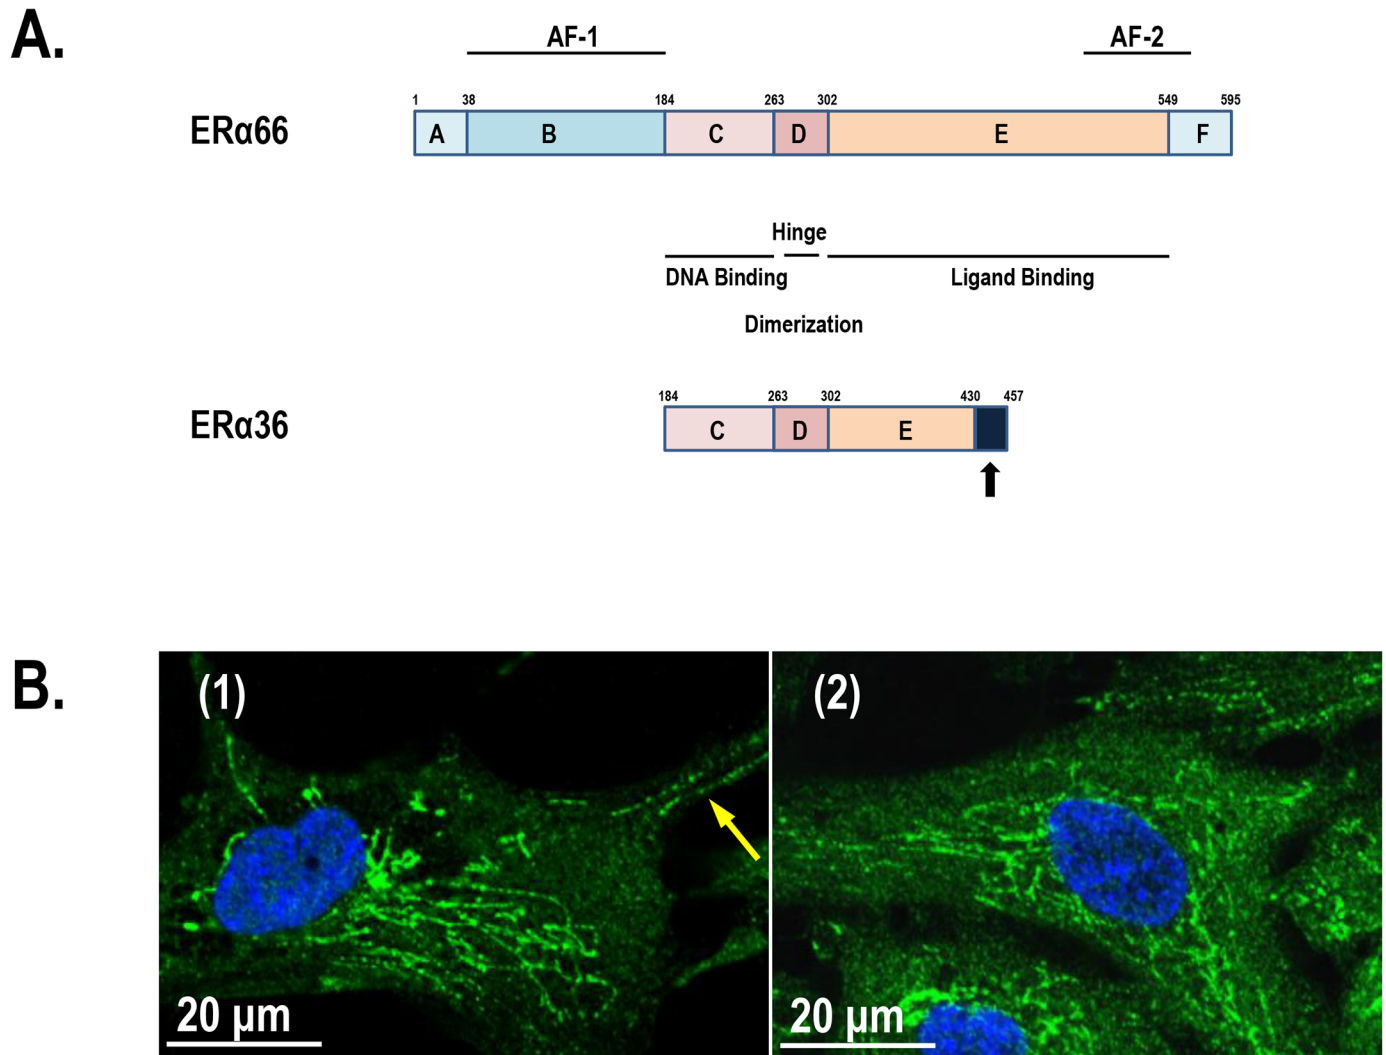

**Fig 1. Comparison of ERα36 and ERα66 domain structures and subcellular ERα36 staining patterns in human uterine smooth muscle (ht-UtSMC) and leiomyoma cells (ht-UtLM).** (A) The top structure shows six conserved domains of ERα66 (labeled A-F), the amino acid sequence numbers, and the transactivation function domains (AF-1 and AF-2). The function of each domain is indicated. In the domain structure of ERα36, the last unique 27 amino acids of ERα36 are indicated as a filled box. The diagram is drawn proportionally to domain size. The drawing is based on the publication by Wang et. al., 2005 and GenBank entry CAE45969.1. (B) In ht-UtSMC cells (1), distinctive ERα36 signals were detected along the plasma membrane as shown by the arrow, but mostly localized within a robust intracytoplasmic network. In ht-UtLM cells (2), the ERα36 signals were detected mostly in a robust network structure within the cytoplasm. The cell samples were stained with ERα36 antibody and DAPI.

<https://doi.org/10.1371/journal.pone.0186078.g001>

leiomyomas remains unclear, the fact that the disease develops during the reproductive years and regresses after menopause indicates that fibroids are hormonally regulated. In order to understand the role of ERα36 in the pathogenesis of fibroids, we thought it important to identify the exact subcellular localization of ERα36 in uterine smooth muscle and leiomyoma cells.

## Materials and methods

### Cell cultures

Human uterine leiomyoma cell line (ht-UtLM) and normal uterine smooth muscle cell line (ht-UtSMC), immortalized via retroviral transfection (pLX1N vector, Clontech Laboratory, Inc.) of human telomerase, were generated by our laboratory [13]. G418 Sulfate (Geneticin<sup>®</sup>)

Selective antibiotic, Life Technologies Cat# 10131–035) was added to ht-UtLM and ht-UtSMCs cell culture media at the concentration of 1.0  $\mu$ l/ml and 1.5  $\mu$ l/ml, respectively. Human ovarian cancer (BG-1), breast cancer (MCF-7), endometrial cancer (Ishikawa), and vulvar leiomyosarcoma (SK-LMS-1) cell lines were all cultured in DMEM medium supplemented with 10% FBS. All of the cultures were kept in a standard tissue culture incubator at 37°C with 5% CO<sub>2</sub>.

### Confocal fluorescence microscopy

The cells were grown in glass bottom microwell dishes (MatTek Corporation, Ashland, MA, USA, Part No# P35G-1.5-14-C). Approximately 50,000 cells were introduced to each dish, and grown for 3 days at 37°C in a CO<sub>2</sub> incubator to reach 80% confluency. The cells were then fixed in cold methanol (-20°C) for 5 min on ice. The ER $\alpha$ 36 antibody used for confocal analysis was kindly provided by Prof. Zhao-Yi Wang (Creighton University Medical center, Omaha, Nebraska). The cells were incubated with the ER $\alpha$ 36 antibody (1:100 dilution) at 4°C overnight, and followed by incubation with Alexa Fluor<sup>®</sup> 488 goat anti-rabbit IgG (H+L) antibody (1:3000 dilution, Molecular Probes, Eugene, OR, USA, Cat# A11008) at room temperature for 1 hour. The cells were then counterstained with 100 ng/mL 4,6-diamidino-2-phenylindole (DAPI, Molecular Probes, Cat# D1306) for 30 min. Confocal images were taken on a Zeiss LSM710-UV Confocal Microscope (Carl Zeiss, Oberkochen, Germany) using a Plan-Apochromat 63X/1.40 oil DIC M27 objective.

SelectFX<sup>®</sup> Alexa Fluor<sup>®</sup> 488 Endoplasmic Reticulum Labeling Kit (Invitrogen, Carlsbad, CA, USA, Cat# S34253) was used for colocalization studies. In this kit, Protein Disulfide Isomerase (PDI) antibody was used to specifically recognize endoplasmic reticulum. MitoTracker<sup>®</sup> Deep Red FM (Invitrogen Cat# M22426) was used to visualize mitochondria. Fluorescently-labeled rhodamine phalloidin (Invitrogen Cat# R415) was used to visualize linear actin microfilament network, F-actin. All were used according to the manufacturer's instructions.

### Quantitative colocalization analysis

The Image J Just Another Colocalization Plugin (JACoP) was applied for quantitative colocalization analyses. Pearson's correlation coefficient was calculated to provide an estimate of the "goodness" of the linear approximation. Cross-correlation analysis was performed to statistically evaluate colocalization [14].

### Peptide competition assay for ER $\alpha$ 36 antibody

Human ER $\alpha$ 36 blocking peptide corresponding to the C-terminus unique sequence of ER $\alpha$ 36 was purchased from Alpha Diagnostic International (San Antonio, TX, Cat# ERA361-P). The ER $\alpha$ 36 antibody was diluted in blocking buffer (1:100 dilution) and a five-times excess of blocking peptide by weight was added to the antibody solution. The mixture was incubated with agitation overnight at 4°C. The confocal staining procedure as described above was done with neutralized and unblocked antibody.

### Subcellular protein fractionation and mitochondrial isolation

The Subcellular Protein Fractionation Kit for Cultured Cells (Pierce Biotechnology, Waltham, MA, USA, Cat# 78840) was used to prepare the various subcellular protein extracts according to the manufacturer's instructions. The ht-UtSMC and ht-UtLM cells were cultured to approximately 90% confluency and were harvested and fractionated. The mitochondrial isolation kit

for cultured cells (Pierce Biotechnology, Cat# 89874) was purchased for preparing mitochondrial fractions, and extracts were prepared according to the manufacturer's instructions.

## Western blot analysis

The ER $\alpha$ 36 antibody was purchased from Cell Applications (San Diego, CA, USA, Cat# CY-1109). This ER $\alpha$ 36 antibody was diluted 1:10,000 in blocking buffer for western blot analyses. Protein concentrations were measured with a Pierce™ BCR Protein Assay kit (Thermo Scientific, Waltham, MA, USA, Cat# 23225) and SpectraMax M5 multi-mode microplate reader (Molecular Devices, Sunnyvale, CA, USA). Protein subcellular fractionations (10  $\mu$ g per fraction) were analyzed with antibodies targeting specific antigens for various cellular compartments. The following primary antibodies anti-HSP90 (C45G5) Rabbit mAb (Cell Signaling, Danvers, MA, USA, Cat# 4877), anti-EGFR (1005) Rabbit (Santa Cruz Biotechnology, Cat# sc-03), anti-SP1 (D4C3) Rabbit mAb (Cell Signaling, Cat# 9389), anti-Histone H3 Rabbit (Cell Signaling, Cat#9715S), and anti-Vimentin (R28) Rabbit (Cell Signaling, Cat#3932) were used to analyze cytoplasmic, membrane, nuclear, chromatin-bound, and cytoskeletal fractions, respectively. The mitochondrial fractions were analyzed with Mortalin antibody (Novus Biologicals, Littleton, CO, USA, Cat# NBP 1-47801 mouse mAb), Prohibitin antibody (Thermo Scientific, Cat# MS-261-P1, mouse mAb), and Src antibody (Cell Signaling, Cat# 2123S, Rabbit mAb) to examine the purity of the mitochondrial preparation. The primary antibodies were diluted at 1:1000 with a blocking buffer (5% BSA in 1X TBST), and the nitrocellulose membrane blots incubated overnight. For secondary antibody incubations, HRP-conjugated ECL™ Anti-Rabbit IgG from donkey (GE Healthcare Life Sciences, Chicago, IL, USA, Cat# NA934V) or HRP-conjugated ECL™ Anti-Mouse IgG from sheep (GE Healthcare Life Sciences, Cat# NA931V) was diluted at 1:5000 and incubated on the blots for 1 hour. The protein blots were subsequently detected with Amersham ECL™ western Blotting Detection Reagents (GE Healthcare Life Sciences, Cat# RPN 2106).

## Co-immunoprecipitation analysis

The ht-UtLM cell culture was maintained in DMEM medium without phenol red, supplemented with 10% dextran-charcoal stripped FBS for 24 hrs, and then treated with  $10^{-8}$  M and  $10^{-6}$  M 17 $\beta$ -Estradiol (E<sub>2</sub>) (Steraloids, Newport, RI, USA, Cat# E0950-000) or ethanol vehicle control for 24 hrs in the same DMEM medium. The cell cultures were washed twice with ice-cold 1X PBS and lysed with lysis buffer (150 mM NaCl, 0.5% Triton X-100, 0.05% Na deoxycholate, 4% glycerol, 1 mM DTT, 10 mM Tris-HCl, pH 7.4) supplemented with protease inhibitor cocktail tablet (Roche Life Science, Indianapolis, IN, Cat# 11836153001). The 50  $\mu$ l of Dynabeads® Protein G (Thermo Fisher Scientific, Cat# 10004D) was incubated with 4  $\mu$ g ER $\alpha$ 36 antibody (Cell Applications, Cat# CY1109) for 10 min at room temperature. The Dynabeads-Ab complex was resuspended with cell lysate and incubated on a rotation rocker at 4°C overnight. The Dynabeads-Ab-Antigen complexes were washed three times using 200  $\mu$ l washing buffer (1x PBS, pH 7.4), eluted with 20  $\mu$ l elution buffer (50 mM Glycine, pH 2.8), separated on SDS-PAGE, and analyzed by western blotting with ER $\alpha$ 36 (Cell Applications, Cat# CY1109) and prohibitin (Thermo Fisher Scientific, Cat# MS-261-P1) antibodies.

## Results

### Subcellular localization of ER $\alpha$ 36 in ht-UtSMC and ht-UtLM cells

To investigate the role of ER $\alpha$ 36 (Fig 1A) in non-genomic mitogenic signaling in human uterine smooth muscle physiology and fibroid pathogenesis, it is imperative to know the exact

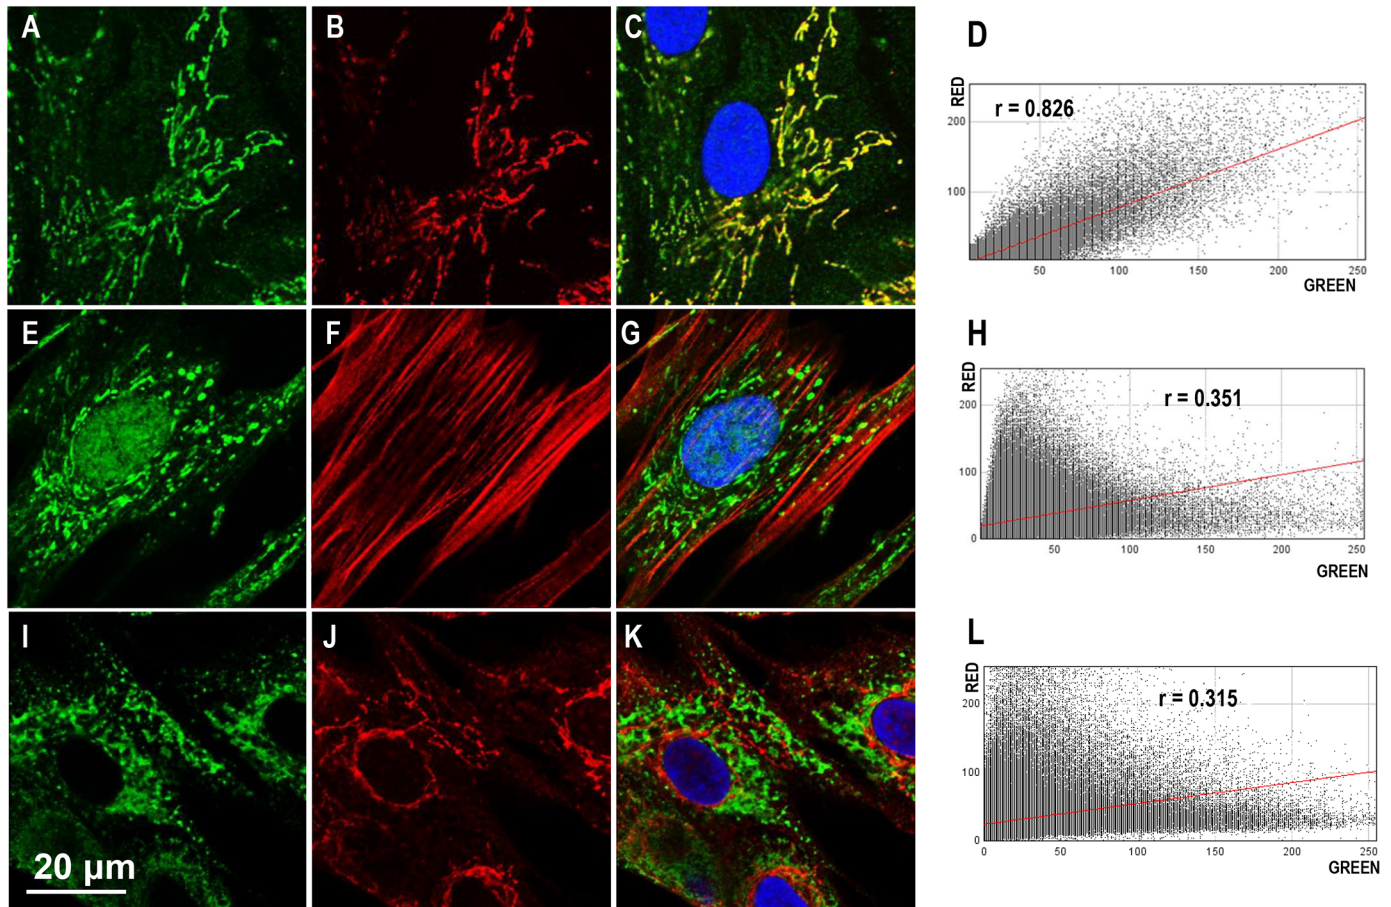

**Fig 2. Colocalization analysis of ER $\alpha$ 36 with mitochondria, F-actin or endoplasmic reticulum in ht-UtSMC cells.** Top row: A. ER $\alpha$ 36 signal channel, B. MitoTracker signal, C. Merged image, D. Scatter plot; Middle row: E. ER $\alpha$ 36 signal channel, F. F-actin dye signal, G. Merged image, H. Scatter plot; Bottom row: I. PDI signal channel, J. ER $\alpha$ 36 signal, K. Merged image, L. Scatter plot. In the scatter plot, the symbol  $r$  represents the Pearson's correlation coefficient. Scale bar = 20  $\mu$ m for all images.

<https://doi.org/10.1371/journal.pone.0186078.g002>

subcellular compartment where ER $\alpha$ 36 is located. When ht-UtSMC and ht-UtLM cells were grown at low density in glass-bottom microwell dishes, and stained with ER $\alpha$ 36 antibody, a unique staining pattern was observed (Fig 1B). In ht-UtSMC cells, the ER $\alpha$ 36 antigen signals were confined mostly to distinctive network structures within the cytoplasm. The positive ER $\alpha$ 36 signals were also detected along the plasma membrane as indicated by the arrow (Fig 1B). There were no detectable ER $\alpha$ 36 signals or very minimal signals in the nuclei of both cell lines.

To determine the identity of the unique subcellular structures recognized by ER $\alpha$ 36 antibody, we colocalized ER $\alpha$ 36 signal with dyes or antibodies specific for mitochondria, F-actin and endoplasmic reticulum. As indicated in Fig 2A–2C, ht-UtSMC cells were double-stained with ER $\alpha$ 36 antibody (green signal) and MitoTracker Deep Red FM (red signal). Confocal evaluation showed that both reagents stained similar network structures within the cells. To quantitatively assess if the green and red signals were colocalized, plugin JACoP was used. As calculated, the Pearson's Coefficient  $r$  was equal to 0.826 (Fig 2D). Additionally, to determine whether the observed colocalization represented coincidental overlap of signals, Cross-Correlation Function (CCF) analyses were applied, where the green image was shifted horizontally in both directions relative to red image, and the Pearson's coefficient was plotted as the

function of pixel shift [14]. CCF analysis showed that the correlation between the two signals was statistically significant (S1A Fig). This indicated that there was strong correlation between ER $\alpha$ 36 signal (green) and mitochondrial signal (red).

To assess whether ER $\alpha$ 36 was associated with cytoskeletal network, ht-UtSMC were subjected to double staining with ER $\alpha$ 36 antibody and rhodamine phalloidin, a dye widely used to visualize F-actin in tissue sections, cell cultures, or cell-free preparations. Confocal images of the ht-UtSMC cells showed that ER $\alpha$ 36 (green signal) and the phalloidin (red signal) stained different subcellular structures (Fig 2E–2G). The Pearson's coefficient ( $r$ ) between two channel signals was 0.267 (Fig 2H). There was no colocalization between ER $\alpha$ 36 and F-actin in ht-UtSMC cells, based on the low coefficient value and the observation that ER $\alpha$ 36 antibody and the rhodamine phalloidin stained independent structures within the cells. The ht-UtSMC cells were further analyzed with ER $\alpha$ 36 antibody (red signal) and an endoplasmic reticulum marker, PDI (Fig 2I–2K). In ht-UtSMC cells, it appeared that ER $\alpha$ 36 antibody and PDI stained distinctively different subcellular structures. The Pearson's coefficient for the signal intensities of the two channels was 0.315 (Fig 2L), strongly suggesting there was no colocalization of ER $\alpha$ 36 with endoplasmic reticulum.

To determine if ER $\alpha$ 36 had similar colocalization patterns with mitochondria, F-actin and endoplasmic reticulum in fibroid cells, we performed similar quantitative analysis for ht-UtLM cells (Fig 3A–3L). The colocalization pattern of ER $\alpha$ 36 and MitoTracker were similar to that observed in ht-UtSMC cells (Fig 3A–3D). The Pearson's Coefficient for ht-UtLM cells was equal to 0.845 (Fig 3D). The CCF analysis indicated there was a significant drop in the value of the coefficient once the green channel image was shifted horizontally in either direction (S1B Fig). In ht-UtLM cells, the ER $\alpha$ 36 (green) and rhodamine phalloidin (red) stained dissimilar subcellular structures (Fig 3E–3H), with the Pearson coefficient being equal to 0.078 (Fig 3H). Therefore, ER $\alpha$ 36 was not associated with cytoskeletal F-actin filament. There was no signal colocalization between ER $\alpha$ 36 (red) and endoplasmic reticulum marker PDI (green) (Fig 3I–3K), as the Pearson coefficient for the signal intensities was 0.371 (Fig 3L). These analyses strongly suggested that ER $\alpha$ 36 was not localized in endoplasmic reticulum.

The above confocal and colocalization analyses demonstrated that ER $\alpha$ 36 was co-localized with mitochondria, with almost no or minimal signal present in plasma membrane, nuclei, endoplasmic reticulum, or actin filaments in either non-cancerous cell line. We found similar findings in female reproductive tract cell lines such as human ovarian cancer (BG-1), breast cancer (MCF-7), endometrial cancer (Ishikawa) and vulvar leiomyosarcoma (SK-LMS-1) cells (S2 Fig).

## ER $\alpha$ 36 peptide blocks ER $\alpha$ 36 expression and mitochondrial colocalization

To determine whether the ER $\alpha$ 36 signal was specifically due to the antibody binding to the unique ER $\alpha$ 36 epitope, we did a competitive binding assay using a blocking peptide composed of the amino acid sequences unique to ER $\alpha$ 36 (Fig 1). As shown in Fig 4, the neutralized ER $\alpha$ 36 antibody failed to stain mitochondria, and the Pearson's correlation coefficient between the two channels was 0.261. In contrast, the non-neutralized ER $\alpha$ 36 antibody readily recognized mitochondrial structures with the coefficient being equal to 0.677. By comparing the staining pattern of the neutralized ER $\alpha$ 36 antibody versus the antibody alone, we determined that the signal detected by ER $\alpha$ 36 antibody in mitochondria was due to the unique ER $\alpha$ 36 C-terminal peptide sequence (Fig 4).

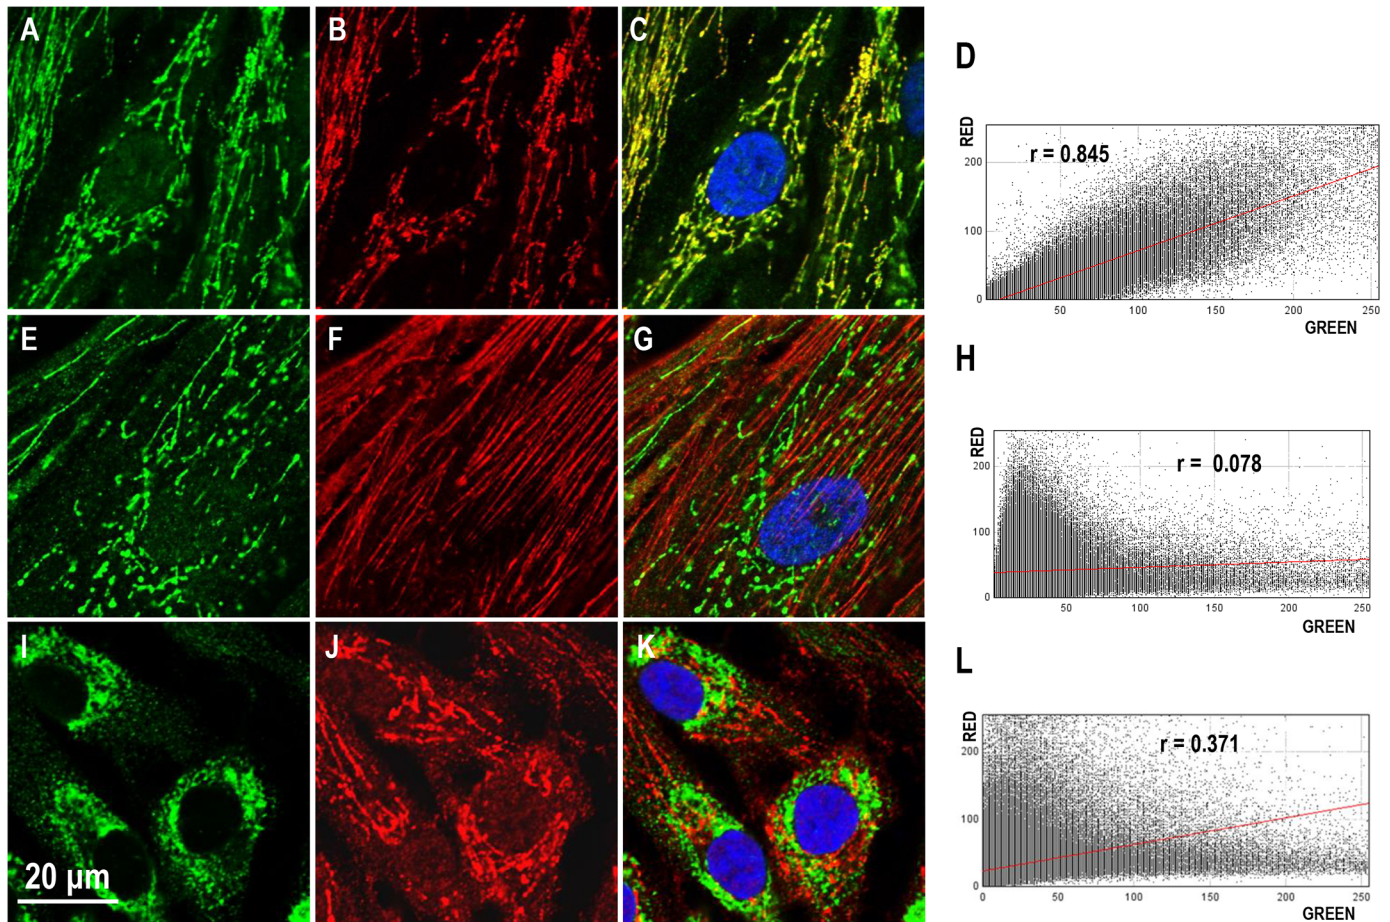

**Fig 3. Colocalization analysis of ER $\alpha$ 36 with mitochondria, F-actin or endoplasmic reticulum in ht-UtLM cells.** Top row: A. ER $\alpha$ 36 signal channel, B. MitoTracker signal, C. Merged image, D. Scatter plot; Middle row: E. ER $\alpha$ 36 signal channel, F. F-actin dye signal, G. Merged image, H. Scatter plot; Bottom row: I. PDI signal channel, J. ER $\alpha$ 36 signal channel, K. Merged image, L. Scatter plot. In the scatter plot, the symbol  $r$  represents the Pearson's correlation coefficient. Scale bar = 20  $\mu$ m for all images.

<https://doi.org/10.1371/journal.pone.0186078.g003>

### ER $\alpha$ 36 association with subcellular membrane fractions

The subcellular fractionation process allows the stepwise separation of cytoplasmic, membrane, nuclear soluble, chromatin-bound, and cytoskeletal proteins. As shown in [S3 Fig](#), the ht-UtSMC and ht-UtLM cells were fractionated into the five subcellular fractions. All the fractions were analyzed by the compartment specific antibodies such as HSP90 (cytoplasmic [cytosol] compartment-specific), EGFR (membrane-specific), SP1 (soluble nuclear fraction), H3 (chromatin-bound, nuclear insoluble), and Vimentin (cytoskeleton-specific). The western analysis showed that the two cell lines were well-fractionated as the antigen distribution was cellular compartment-specific ([S3 Fig](#)). When the fractionated samples were blotted with ER $\alpha$ 36 antibody, only the membrane fraction displayed significant ER $\alpha$ 36 signal at approximately 36 kDa ([Fig 5](#)). However, trace amounts of ER $\alpha$ 36 were also detected in the nuclear soluble fractions for both cell types, which may due to the carryover between membrane and nuclear fractions; although minimal nuclear staining was also observed in the confocal images for both cell types.

We also isolated intact mitochondria from other cytosolic components in ht-UtSMC and ht-UtLM cells. To check for the purity of the isolated mitochondria, the preparations were



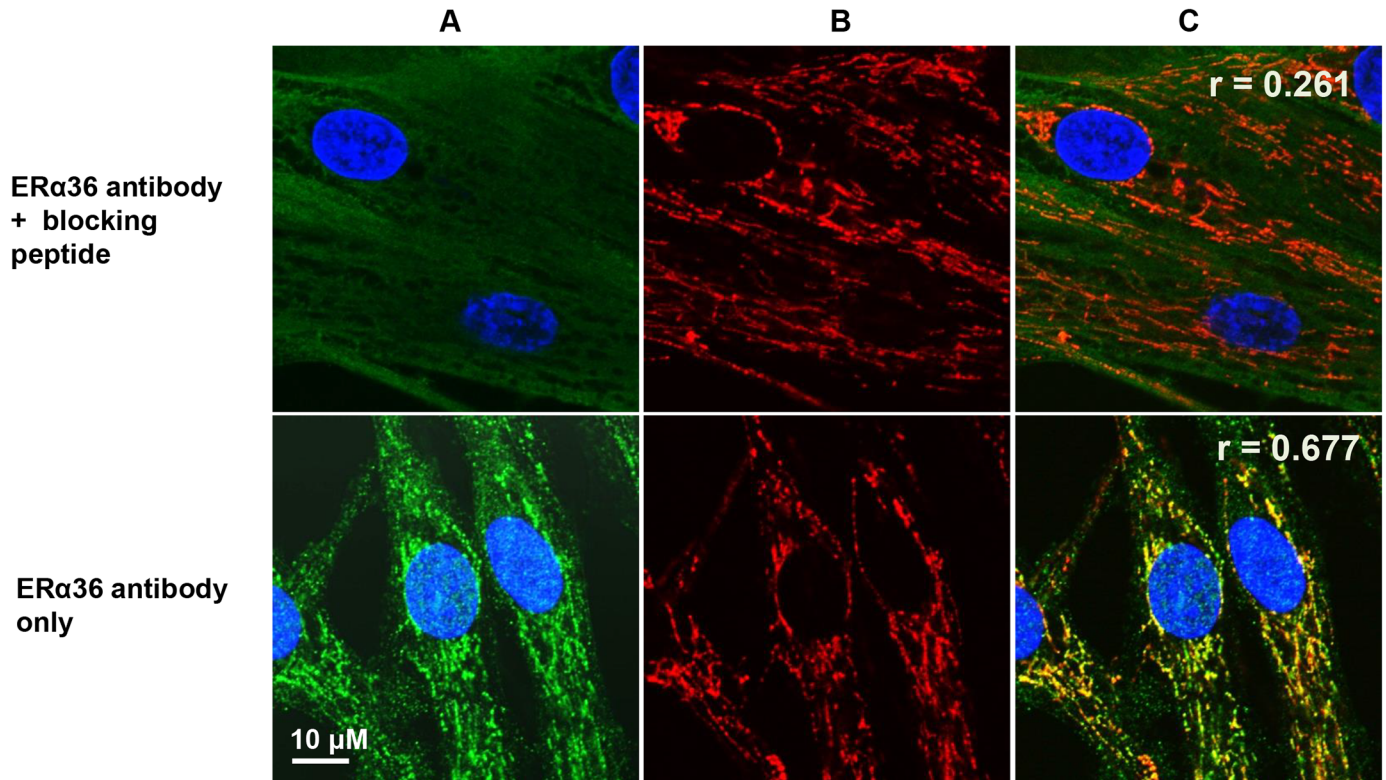

**Fig 4. ERα36 blocking peptide competition assay in ht-UtLM cells.** Ht-UtLM cells were incubated with MitoTracker and then stained with either neutralized ERα36 antibody (top row) or non-neutralized antibody (bottom row). Abbreviations: A. ERα36 signal; B. MitoTracker; C. Merged images. Scale bar = 10 μm for all images.

<https://doi.org/10.1371/journal.pone.0186078.g004>

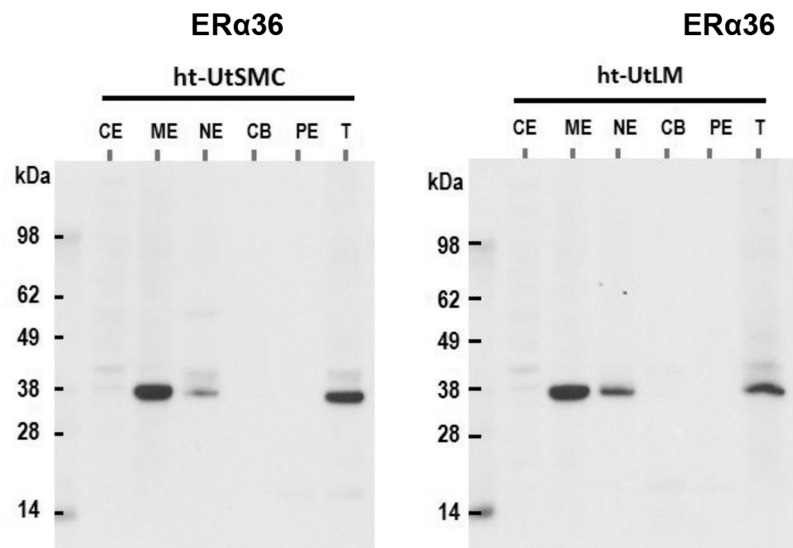

**Fig 5. ERα36 Expression in subcellular fractions.** Cellular Fraction Abbreviations: CE (cytoplasmic extract); ME (membrane extract); CB (chromatin-bound extract); NE (nuclear extract, nuclear soluble); PE (pellet extract, cytoskeleton); T (total cellular protein extract).

<https://doi.org/10.1371/journal.pone.0186078.g005>

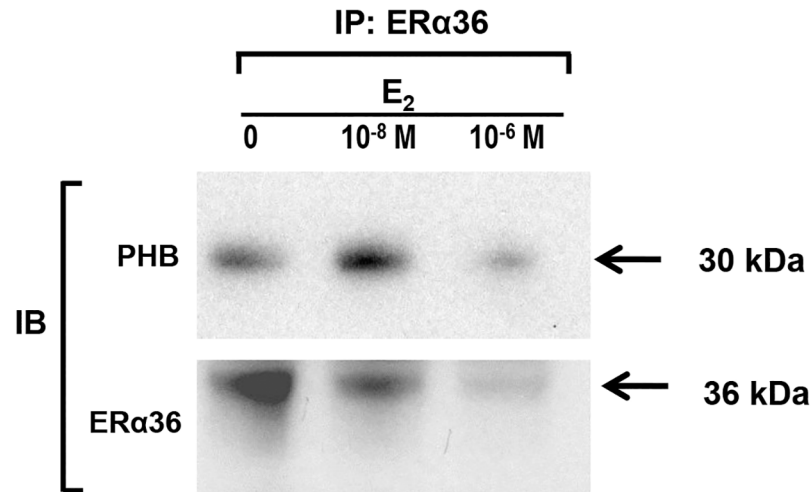

**Fig 6. Interactions of ER $\alpha$ 36 and prohibitin in human uterine leiomyoma cells.** The interactions between ER $\alpha$ 36 and prohibitin were determined with a co-immunoprecipitation (Co-IP). Ht-UtLM cells were treated with vehicle control,  $10^{-8}$  M E $_2$ , and  $10^{-6}$  M E $_2$  for 24 hours. The blots presented are representative results that were repeated at least three times. PHB: prohibitin; IB: Immunoblotting; IP: Immunoprecipitation.

<https://doi.org/10.1371/journal.pone.0186078.g006>

blotted with antibodies against mitochondrial marker proteins such as mortalin, prohibitin, and Src [15–17]. When the fractionated mitochondrial preparations were blotted with mortalin antibodies, the signals were found exclusively in mitochondrial fractions of the two cell lines (S4A Fig). The Src signals were also significantly enriched in mitochondrial fractions although as to be expected, expression was also present in the cytosol (S4B Fig). As for prohibitin, we observed that the antigen was almost exclusively detected in the mitochondrial fractions (S4C Fig). These results suggested these three mitochondrial-specific proteins were abundantly and almost exclusively present in mitochondria.

### ER $\alpha$ 36 is associated with mitochondrial specific protein, prohibitin

It is known that the transcriptional activity of ER $\alpha$  is regulated by several coregulators, including prohibitin. Recently, the direct interaction of prohibitin-2 and the ER $\alpha$  ligand binding domain was demonstrated by structural analysis [16]. To determine whether ER $\alpha$ 36 was associated with the mitochondrial protein prohibitin, interactions between ER $\alpha$ 36 and prohibitin were evaluated with co-immunoprecipitation in ht-UtLM cells. As shown in Fig 5, the interactions were detected in control or samples treated with two concentrations ( $10^{-8}$  M or  $10^{-6}$  M) of E $_2$ . The amount of prohibitin pulled down by ER $\alpha$ 36 was the highest when the cultures were treated with  $10^{-8}$  M E $_2$  for 24 hours. Interestingly, the amount of ER $\alpha$ 36 antigen detected was the highest when the cultures had not been subjected to E $_2$  treatment, although association of ER $\alpha$ 36 with prohibitin was less. It appeared that exogenous E $_2$  decreased ER $\alpha$ 36 expression in the cells, but increased its association with prohibitin at the lower concentration. The functional significance of the changes in ER $\alpha$ 36 protein expression in response to E $_2$  remains to be determined. However, the association of ER $\alpha$ 36 with the mitochondrial-specific protein prohibitin was clearly visible (Fig 6).

### Discussion

Although there have been comprehensive reports on the subcellular localization of ER $\alpha$ 36, non-genomic signaling and its role in malignant cancer cell growth [8–10], there are no

studies, to our knowledge, that describe the distinctive staining pattern and specific mitochondrial subcellular localization of ER $\alpha$ 36 observed in this study. A quantitative colocalization analysis with a Pearson's correlation coefficient was applied to evaluate ER $\alpha$ 36 subcellular localization in human uterine leiomyoma (ht-UtLM) and uterine smooth muscle (ht-UtSMC) cells. It is generally accepted that the fluorescence signals can be interpreted as colocalized when the Pearson's correlation coefficient is greater than 0.5 [18,19]. With CCF analysis, colocalized structures show a peak at zero pixelshift and a bell-shaped curve, whereas, partially overlapping structures show a peak to one side of zero pixelshift [14]. Structures that are mutually exclusive of each other display a drop at zero pixelshift in CCF [14]. We studied ER $\alpha$ 36 colocalization with various subcellular compartment markers targeting endoplasmic reticulum, a cytoskeletal filament, and mitochondria. In ht-UtSMC and ht-UtLM cells, the Pearson's correlation coefficient between ER $\alpha$ 36 and MitoTracker signal was equal to 0.826 and 0.845, respectively, indicating that ER $\alpha$ 36 was significantly colocalized with mitochondria. With CCF analysis, both ht-UtSMC and ht-UtLM cells displayed a peak at zero pixelshift and symmetrical bell-shaped curves, further supporting the idea that ER $\alpha$ 36 is colocalized with mitochondria [14]. On the other hand, the coefficients for F-actin and endoplasmic reticulum markers were significantly below the threshold required to be considered colocalized. Therefore, we excluded the possibility that ER $\alpha$ 36 was associated with either F-actin or endoplasmic reticulum in these two cell lines to any great extent.

Two prohibitin homologues, Phb1 and Phb2, assemble into a high molecular weight complex of ~1.2 MDa in the mitochondrial inner membrane, and appear to be a reliable mitochondrial marker [20]. It is proposed that prohibitins serve as chaperones for respiration chain proteins or as general structural scaffolding required for optimal mitochondrial morphology and function [20]. The mitochondrial chaperone mortalin belongs to the Hsp70 family and is required for transporting protein from the cytoplasm to mitochondria [15]. Other proteins such as the Src family members (Fgr, Fyn, Lyn and c-Src) are all constitutively expressed and have been detected in mitochondria [21]. In our studies, western blot analysis with these mitochondrial markers suggested that the mitochondrial preparations were mostly free from contamination of other organelles and, in particular, prohibitin was specifically associated with mitochondria in ht-UtLM cells.

In addition to the fractionation studies, we found that ER $\alpha$ 36 was co-precipitated with the mitochondrial-specific protein prohibitin. It is reported that prohibitin 2 binds to the ligand binding domain of ER $\alpha$ 66 and represses its transcriptional activity [16]. It has been shown that E<sub>2</sub> stimulates prohibitin expression in white adipose tissue and in the liver of rats [22]. In a cell culture model (3T3-L1 and C9 cells), transcription and protein levels of prohibitin were also dose-dependently increased by E<sub>2</sub> treatment, further supporting *in vivo* data that prohibitin expression may be regulated by estrogens and intracellular steroid hormone signaling pathways [22]. We observed that 10<sup>-8</sup> M E<sub>2</sub> increased prohibitin protein expression and its association with ER $\alpha$ 36, but reduced ER $\alpha$ 36 levels in ht-UtLM cells. Also, a higher concentration of 10<sup>-6</sup> M E<sub>2</sub> reduced both prohibitin and ER $\alpha$ 36 protein expression levels and their association in ht-UtLM cells. The difference in the responses to E<sub>2</sub> observed in our study compared to that reported [22] may due to the unique cell types or concentrations of E<sub>2</sub> used. The presence of ER $\alpha$ 36 in mitochondria and its association with the mitochondrial protein prohibitin suggests that ER $\alpha$ 36 may mediate critical roles in maintaining mitochondrial structure and function.

Immunofluorescence analyses of Ishikawa cancer cells have demonstrated that ER $\alpha$ 36 is mostly present in the plasma membrane and cytoplasm, while ER $\alpha$ 66 is predominantly expressed in the nucleus [23]. In Ishikawa cells, we also observed a similar ER $\alpha$ 36 subcellular distribution pattern as previously reported [23]. In the four human female reproductive tract cancer cell lines (BG-1, Ishikawa, MCF-7, and SK-LMS-1) we evaluated, it appeared that the

mitochondria were arranged in an extremely compact, perinuclear cytoplasmic space. As ER $\alpha$ 36 is mostly associated with a mitochondrial network, the extreme compactness of the mitochondria may have contributed to the controversy associated with ER $\alpha$ 36 subcellular localization in the literature [8–10].

Mitochondria are key cellular organelles that regulate critical processes such as energy production and apoptosis. Receptors for glucocorticoids, estrogens, androgens, and thyroid hormones have been detected in mitochondria of various cell types [24,25]. Both estrogen receptors ER $\alpha$  and ER $\beta$  have been found in the nucleus, plasma membrane, and in mitochondria, where they are proposed to mediate the differential physiological effects of estrogens [26,27]. It is suggested that estrogen receptors are imported into mitochondria, through tethering to cytosolic chaperone proteins and/or through direct interaction with mitochondrial import proteins [28]. Estrogen promotes mitochondrial activity by enhancing mitochondrial biogenesis and sustaining mitochondrial energy-producing capacity. Alterations in mitochondrial bioenergetic pathways is believed to mediate estrogen-induced tumorigenesis [29]. Estrogens have also been shown to affect concentrations and localization of anti-apoptotic factors, which appear to exert their anti-apoptotic effects via the maintenance of mitochondrial membrane potential in the face of stressors. Mitochondrial membrane potential collapse is a critical event leading to cell death, and the available data indicate that estrogens may protect mitochondria by preventing membrane potential collapse [28].

Due to ER $\alpha$ 36's unique domain architecture, its predominant mitochondrial presence, and the evidence that ER $\alpha$ 36 is associated with the mitochondrial protein prohibitin in leiomyoma cells, we propose that ER $\alpha$ 36 may be essential for maintaining mitochondrial structure and function. The potential interactions between ER $\alpha$ 36 and the mitochondrial genome, as well as the interactions with mitochondrial-specific proteins critical for oxidative phosphorylation, oxidative stress protection, apoptosis, and estrogen signaling warrant further investigations. Additional studies on ER $\alpha$ 36 and mitochondrial functions may shed light on human fibroid and cancer development mechanisms, and help to create effective treatment strategies in hormonally associated diseases, such as breast cancer. Targeting mitochondrial-associated ER $\alpha$ 36 would be a promising therapeutic approach for the treatment of a variety of cancers and diseases, including fibroid tumors.

## Supporting information

**S1 Fig. Cross correlation function (CCF) analysis of the confocal images stained by ER $\alpha$ 36 antibody and MitoTracker.** A. ht-UtSMC cell culture. B. ht-UtLM cell culture. The CCF graphs were generated by Image J plugin JACoP.  
(TIF)

**S2 Fig. ER $\alpha$ 36 (green) and MitoTracker (red) colocalization analysis in BG-1, MCF-7, Ishikawa and SK-LMS-1 cell lines.** DAPI, B. ER $\alpha$ 36 signal, C. MitoTracker signal, D. Merged image.  
(TIF)

**S3 Fig. Subcellular protein fractionations from human uterine cells analyzed with subcellular-specific markers.** The subcellular fractionation procedure was effective in separating the subcellular components, as shown by western blot analyses with respective subcellular markers. Abbreviations: HSP90 (HSP90 Rabbit mAb, Cell Signaling #4877), EGFR (EGFR Rabbit Polyclonal Antibody, Santa Cruz Biotechnology Cat# sc-03), SP1 (SP1 Rabbit mAb, Cell Signaling Cat# 9389), H3 (Histone H3 Rabbit Polyclonal Antibody, Cell Signaling Cat#9715), Vimentin (Vimentin Rabbit polyclonal Antibody, Cell Signaling Cat# 3932). CE (cytoplasmic

extract), ME (membrane extract), NE (nuclear extract, nuclear soluble), CB (chromatin-bound extract), PE (pellet extract, cytoskeleton).  
(TIF)

**S4 Fig. Western blot analysis of mitochondrial fractions with specific mitochondrial markers.** (A) Blot is probed for Mortalin expression. (B) Blot was probed for Src expression. (C). Blot was probed for Prohibitin expression. Abbreviations: C. Cytosol fraction; M. Mitochondrial fraction.  
(TIF)

## Acknowledgments

We sincerely thank Dr. Zhao-Yi Wang from Creighton University Medical Center for his generosity in providing the ER $\alpha$ 36 antibody. We are very grateful to Mr. Jeff Tucker and Dr. Agnes Janoshazi from the NIEHS confocal imaging facility for their excellent technical advice on confocal instrument usage and image analysis. This research was supported by the National Toxicology Program (NTP) and the Intramural Research Program of the National Institutes of Health (NIH), National Institute of Environmental Health Sciences (NIEHS).

## Author Contributions

**Conceptualization:** Yitang Yan, Darlene Dixon.

**Data curation:** Yitang Yan, Linda Yu, Lysandra Castro.

**Formal analysis:** Yitang Yan, Linda Yu, Lysandra Castro, Darlene Dixon.

**Investigation:** Yitang Yan, Linda Yu, Lysandra Castro, Darlene Dixon.

**Methodology:** Yitang Yan, Linda Yu, Lysandra Castro.

**Project administration:** Darlene Dixon.

**Resources:** Darlene Dixon.

**Supervision:** Darlene Dixon.

**Validation:** Yitang Yan, Linda Yu, Lysandra Castro.

**Visualization:** Yitang Yan, Linda Yu, Lysandra Castro, Darlene Dixon.

**Writing – original draft:** Yitang Yan.

**Writing – review & editing:** Darlene Dixon.

## References

1. Giguere V (2002) To ERR in the estrogen pathway. *Trends Endocrinol Metab* 13: 220–225. PMID: [12185669](https://pubmed.ncbi.nlm.nih.gov/12185669/)
2. Heldring N, Pike A, Andersson S, Matthews J, Cheng G, Hartman J, et al. (2007) Estrogen receptors: how do they signal and what are their targets. *Physiol Rev* 87: 905–931. <https://doi.org/10.1152/physrev.00026.2006> PMID: [17615392](https://pubmed.ncbi.nlm.nih.gov/17615392/)
3. Wang Z, Zhang X, Shen P, Loggie BW, Chang Y, Deuel TF (2005) Identification, cloning, and expression of human estrogen receptor-alpha36, a novel variant of human estrogen receptor-alpha66. *Biochem Biophys Res Commun* 336: 1023–1027. <https://doi.org/10.1016/j.bbrc.2005.08.226> PMID: [16165085](https://pubmed.ncbi.nlm.nih.gov/16165085/)
4. Wang Z, Zhang X, Shen P, Loggie BW, Chang Y, Deuel TF (2006) A variant of estrogen receptor- $\alpha$ , hER- $\alpha$ 36: transduction of estrogen- and antiestrogen-dependent membrane-initiated mitogenic signaling. *Proc Natl Acad Sci U S A* 103: 9063–9068. <https://doi.org/10.1073/pnas.0603339103> PMID: [16754886](https://pubmed.ncbi.nlm.nih.gov/16754886/)

5. Zhang J, Li G, Li Z, Yu X, Zheng Y, Jin K, et al. (2012) Estrogen-independent effects of ER-alpha36 in ER-negative breast cancer. *Steroids* 77: 666–673. <https://doi.org/10.1016/j.steroids.2012.02.013> PMID: 22402113
6. Li G, Zhang J, Jin K, He K, Zheng Y, Xu X, et al. (2013) Estrogen receptor-alpha36 is involved in development of acquired tamoxifen resistance via regulating the growth status switch in breast cancer cells. *Mol Oncol* 7: 611–624. <https://doi.org/10.1016/j.molonc.2013.02.001> PMID: 23499324
7. Chakraborty P, Roy SK (2013) Expression of estrogen receptor alpha 36 (ESR36) in the hamster ovary throughout the estrous cycle: effects of gonadotropins. *PLoS One* 8: e58291. <https://doi.org/10.1371/journal.pone.0058291> PMID: 23555574
8. Lin SL, Yan LY, Liang XW, Wang ZB, Wang ZY, Qiao J, et al. (2009) A novel variant of ER-alpha, ER-alpha36 mediates testosterone-stimulated ERK and Akt activation in endometrial cancer Hec1A cells. *Reprod Biol Endocrinol* 7: 102. <https://doi.org/10.1186/1477-7827-7-102> PMID: 19775474
9. Pelekanou V, Notas G, Kampa M, Tsentelierou E, Radojicic J, Leclercq G, et al. (2012) ERalpha36, a new variant of the ERalpha is expressed in triple negative breast carcinomas and has a specific transcriptomic signature in breast cancer cell lines. *Steroids* 77: 928–934. <https://doi.org/10.1016/j.steroids.2011.12.016> PMID: 22198466
10. Wallacides A, Chesnel A, Ajj H, Chillet M, Flament S, Dumond H (2012) Estrogens promote proliferation of the seminoma-like TCam-2 cell line through a GPER-dependent ERalpha36 induction. *Mol Cell Endocrinol* 350: 61–71. <https://doi.org/10.1016/j.mce.2011.11.021> PMID: 22138413
11. Soltysik K, Czekaj P (2015) ERalpha36—Another piece of the estrogen puzzle. *Eur J Cell Biol* 94: 611–625. <https://doi.org/10.1016/j.ejcb.2015.10.001> PMID: 26522827
12. Walker CL, Stewart EA (2005) Uterine fibroids: the elephant in the room. *Science* 308: 1589–1592. <https://doi.org/10.1126/science.1112063> PMID: 15947177
13. Carney SA, Tahara H, Swartz CD, Risinger JI, He H, Moore AB, et al. (2002) Immortalization of human uterine leiomyoma and myometrial cell lines after induction of telomerase activity: molecular and phenotypic characteristics. *Lab Invest* 82: 719–728. PMID: 12065682
14. Bolte S, Cordelieres FP (2006) A guided tour into subcellular colocalization analysis in light microscopy. *J Microsc* 224: 213–232. <https://doi.org/10.1111/j.1365-2818.2006.01706.x> PMID: 17210054
15. Burbulla LF, Schelling C, Kato H, Rapaport D, Woitalla D, Schiesling C, et al. (2010) Dissecting the role of the mitochondrial chaperone mortalin in Parkinson's disease: functional impact of disease-related variants on mitochondrial homeostasis. *Hum Mol Genet* 19: 4437–4452. <https://doi.org/10.1093/hmg/ddq370> PMID: 20817635
16. Chigira T, Nagatoishi S, Tsumoto K (2015) Differential binding of prohibitin-2 to estrogen receptor alpha and to drug-resistant ERalpha mutants. *Biochem Biophys Res Commun* 463: 726–731. <https://doi.org/10.1016/j.bbrc.2015.06.002> PMID: 26049107
17. Tibaldi E, Brunati AM, Massimino ML, Stringaro A, Colone M, Agostinelli E, et al. (2008) Src-Tyrosine kinases are major agents in mitochondrial tyrosine phosphorylation. *J Cell Biochem* 104: 840–849. <https://doi.org/10.1002/jcb.21670> PMID: 18247338
18. Dunn KW, Kamocka MM, McDonald JH (2011) A practical guide to evaluating colocalization in biological microscopy. *Am J Physiol Cell Physiol* 300: C723–742. <https://doi.org/10.1152/ajpcell.00462.2010> PMID: 21209361
19. Zinchuk V, Zinchuk O (2008) Quantitative colocalization analysis of confocal fluorescence microscopy images. *Curr Protoc Cell Biol* Chapter 4: Unit 4 19. <https://doi.org/10.1002/0471143030.cb0419s39> PMID: 18551422
20. Tatsuta T, Model K, Langer T (2005) Formation of membrane-bound ring complexes by prohibitins in mitochondria. *Mol Biol Cell* 16: 248–259. <https://doi.org/10.1091/mbc.E04-09-0807> PMID: 15525670
21. Hebert-Chatelain E (2013) Src kinases are important regulators of mitochondrial functions. *Int J Biochem Cell Biol* 45: 90–98. <https://doi.org/10.1016/j.biocel.2012.08.014> PMID: 22951354
22. Choi M, Chaudhari HN, Ji YR, Ryoo ZY, Kim SW, Yun JW (2015) Effect of estrogen on expression of prohibitin in white adipose tissue and liver of diet-induced obese rats. *Mol Cell Biochem* 407: 181–196. <https://doi.org/10.1007/s11010-015-2468-1> PMID: 26048717
23. Tong JS, Zhang QH, Wang ZB, Li S, Yang CR, Fu XQ, et al. (2010) ER-alpha36, a novel variant of ER-alpha, mediates estrogen-stimulated proliferation of endometrial carcinoma cells via the PKCdelta/ERK pathway. *PLoS One* 5: e15408. <https://doi.org/10.1371/journal.pone.0015408> PMID: 21079811
24. Sekeris CE (1990) The mitochondrial genome: a possible primary site of action of steroid hormones. *In Vivo* 4: 317–320. PMID: 2133104
25. Psarra AM, Sekeris CE (2008) Steroid and thyroid hormone receptors in mitochondria. *IUBMB Life* 60: 210–223. <https://doi.org/10.1002/iub.37> PMID: 18344181

26. Ivanova MM, Mazhawidza W, Dougherty SM, Klinge CM (2010) Sex differences in estrogen receptor subcellular location and activity in lung adenocarcinoma cells. *Am J Respir Cell Mol Biol* 42: 320–330. <https://doi.org/10.1165/rcmb.2009-0059OC> PMID: 19556604
27. Velickovic K, Cvoro A, Srdic B, Stokic E, Markelic M, Golic I, et al. (2014) Expression and subcellular localization of estrogen receptors alpha and beta in human fetal brown adipose tissue. *J Clin Endocrinol Metab* 99: 151–159. <https://doi.org/10.1210/jc.2013-2017> PMID: 24217905
28. Simpkins JW, Yang SH, Sarkar SN, Pearce V (2008) Estrogen actions on mitochondria—physiological and pathological implications. *Mol Cell Endocrinol* 290: 51–59. <https://doi.org/10.1016/j.mce.2008.04.013> PMID: 18571833
29. Chen JQ, Russo PA, Cooke C, Russo IH, Russo J (2007) ERbeta shifts from mitochondria to nucleus during estrogen-induced neoplastic transformation of human breast epithelial cells and is involved in estrogen-induced synthesis of mitochondrial respiratory chain proteins. *Biochim Biophys Acta* 1773: 1732–1746. <https://doi.org/10.1016/j.bbamcr.2007.05.008> PMID: 17604135
